# Supplementary material for: Accurate absolute free energies for ligand–protein binding based on non-equilibrium approaches
Source: PubMed Central journal article supplement (PMC9814727; doi:10.1038/s42004-021-00498-y), 2021-05-11
Supplement: 42004_2021_498_MOESM2_ESM.pdf [file 42004_2021_498_MOESM2_ESM.pdf]

## **Description of Additional Supplementary Files**

**File Name:** Supplementary Data 1

**Description:** Free energy values reported in the Figures 2-8
